# Supplementary material for: In-situ liquid cell transmission electron microscopy investigation on oriented attachment of gold nanoparticles
Source: PubMed Central journal article supplement (PMC5788991; doi:10.1038/s41467-018-02925-6), 2018-01-29
Supplement: 41467_2018_2925_MOESM3_ESM.pdf [file 41467_2018_2925_MOESM3_ESM.pdf]

## **Description of Supplementary Files**

File Name: Supplementary Movie 1

Description: The dissolution of large gold particles under electron beam irradiation and generation of small particles in the meantime.

File Name: Supplementary Movie 2

Description: The motion and dissolution behaviours of large gold particles inside a liquid pocket.

File Name: Supplementary Movie 3

Description: Oriented attachment trajectories of two small gold particles, which finally form a single particle with twin interface at their contact surfaces.

File Name: Supplementary Movie 4

Description: Oriented attachment trajectories of two small gold particles, which finally form a monocrystalline particle.
